# Supplementary material
Source: Springer Nature journal article supplement (https://www.springermedizin.de/resource/supplementary/12875_2011_667_MOESM10_ESM.pdf/9435232)

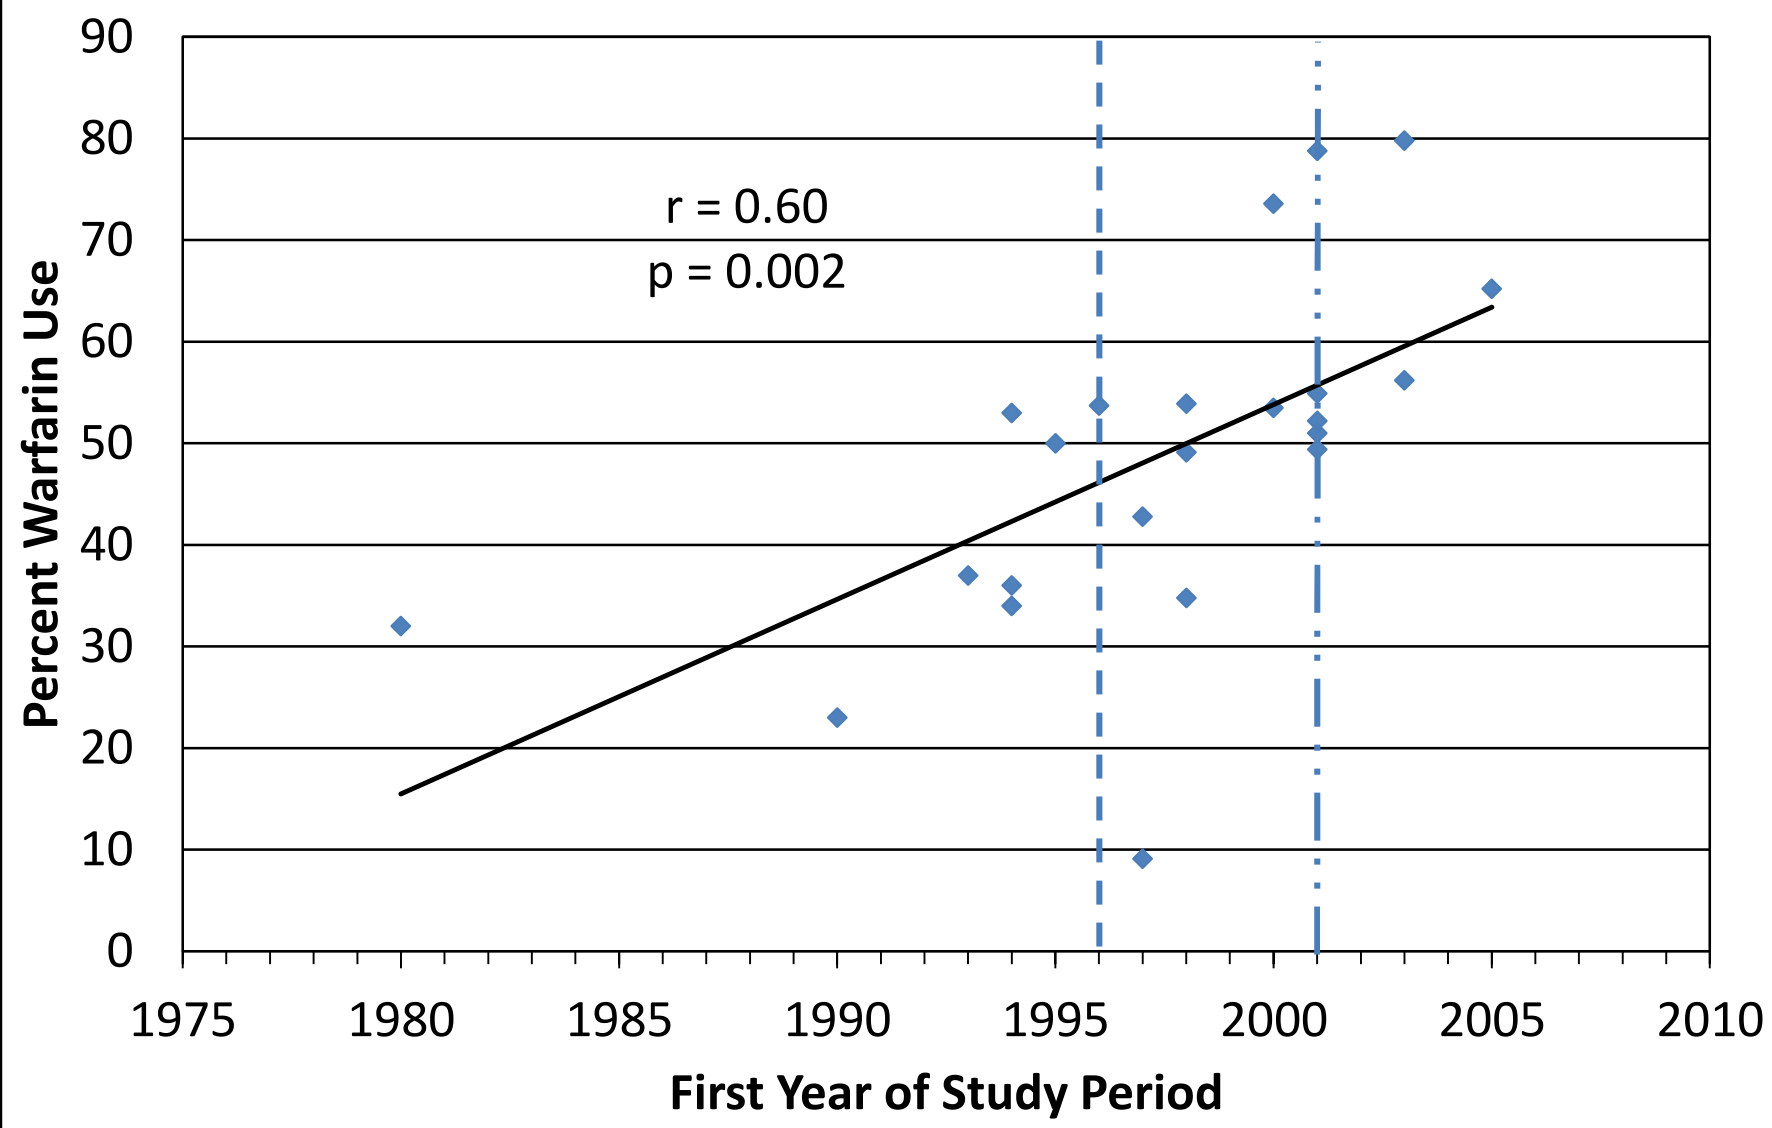

Supplement: MOESM10 [file 9435232]
